# Supplementary material for: Cost-Effectiveness of Pharmacogenomic and Pharmacogenetic Test-Guided Personalized Therapies: A Systematic Review of the Approved Active Substances for Personalized Medicine in Germany
Source: PubMed Central journal article supplement — Adv Ther. 2016 Jul 12;33(9):1461–80. doi: 10.1007/s12325-016-0376-8 (PMC5020122; doi:10.1007/s12325-016-0376-8), 2016-07-12
Supplement: 12325_2016_376_MOESM1_ESM.pdf [file 12325_2016_376_MOESM1_ESM.pdf]

## Supplementary Material 1: Approved personalized drugs

| active ingredient    | therapeutic area                                     | testing of      | test description                                                           | recommended or obligate test   |
|----------------------|------------------------------------------------------|-----------------|----------------------------------------------------------------------------|--------------------------------|
| Abacavir             | HIV                                                  | Adverse effects | HLA-B*5701                                                                 | Compulsory test since 02/2008  |
| Afatinib             | Lung cancer                                          | Effectiveness   | EGFR                                                                       | Compulsory test since 09/2013  |
| Anastrozole          | Breast cancer                                        | Effectiveness   | Hormone receptor positive breast cancer cells                              | Compulsory test since 06/1996  |
| Arsenic trioxide     | Acute promyelocytic leukaemia                        | Effectiveness   | Promyelocytic leukaemia-/Retinoic acid receptor alpha (PML/RAR-alpha) gene | Compulsory test since 03/2002  |
| Ataluren             | Duchenne muscular dystrophy                          | Effectiveness   | Nonsense-Mutation of the dystrophy -gene                                   | Compulsory test since 07/2014  |
| Azathioprine         | Immunosuppressant                                    | Adverse effects | TMPT                                                                       | Recommended                    |
| Blinatumomab         | Acute lymphatic leukaemia                            | Effectiveness   | Philadelphia-Chromosome                                                    | Compulsory test since 11/2015  |
| Bosutinib            | Chronic myelogenous leukaemia                        | Effectiveness   | Philadelphia-Chromosome                                                    | Compulsory test since 03/2013  |
| Brentuximab vedotin  | Hodgkin Lymphomas and anaplastic large cell lymphoma | Effectiveness   | Test of CD30 overexpression                                                | Compulsory test since 10/2012  |
| Carbamazepine        | Epilepsy                                             | Adverse effects | HLA-B*1502-allele                                                          | Recommended                    |
| Ceritinib            | Lung cancer                                          | Effectiveness   | Anaplastic lymphoma kinase (ALK)                                           | Compulsory test since 05/2015  |
| Cetuximab            | Colorectal cancer                                    | Effectiveness   | Non-mutated (wild-type) RAS-gene                                           | Compulsory test since 07/2008  |
| Cobimetinib          | Melanoma                                             | Effectiveness   | BRAF V600 mutation                                                         | Compulsory test since 11/2015  |
| Crizotinib           | Lung cancer                                          | Effectiveness   | EML4-ALK                                                                   | Compulsory test since 10/2012  |
| Dabrafenib           | Melanoma                                             | Effectiveness   | BRAF V600 mutation                                                         | Compulsory test since 08/2013  |
| Dasatinib            | Acute lymphatic leukaemia                            | Effectiveness   | Philadelphia-Chromosome                                                    | Compulsory test since 11/2006  |
| Eliglustat           | Gaucher Disease                                      | Effectiveness   | Cytochrome-P450 Type 2D6 (CYP2D6)                                          | Compulsory test since 01/2015  |
| Erlotinib            | Lung cancer                                          | Effectiveness   | EGFR                                                                       | Compulsory test since 08/2011  |
| Everolimus           | Breast cancer                                        | Effectiveness   | HER2/neu-expression                                                        | Compulsory test since 07/2012  |
| Exemestane           | Breast cancer                                        | Effectiveness   | Estrogen receptor positive breast cancer cells                             | Compulsory test since 12/1999  |
| Fulvestrant          | Breast cancer                                        | Effectiveness   | Hormone receptor positive breast cancer cells                              | Compulsory test since 03/2004  |
| Gefitinib            | Lung cancer                                          | Effectiveness   | EGFR                                                                       | Compulsory test since 07/2009  |
| Ibrutinib            | Chronic lymphatic leukaemia                          | Effectiveness   | Deletion or TP53-mutation                                                  | Compulsory test since 10/2014  |
| Imatinib             | Acute lymphatic and chronic myelogenous leukaemia    | Effectiveness   | Philadelphia-Chromosome                                                    | Compulsory test since 11/2001  |
| Ivacaftor            | Mucoviscidosis with specific mutations               | Effectiveness   | Specific mutation of the CFTR-gene                                         | Compulsory test since 07/2012  |
| Lapatinib            | Breast cancer                                        | Effectiveness   | HER2-overexpression                                                        | Compulsory test since 06/2008  |
| Letrozol             | Breast cancer                                        | Effectiveness   | Hormone receptor positive breast cancer cells                              | Compulsory test since 01/1997  |
| Lomitapide           | Increased cholesterol- or blood lipid level          | Effectiveness   | Genetic evidence of homozygous familial hypercholesterolemia               | Recommended test since 07/2013 |
| Lumacaftor/Ivacaftor | Mucoviscidosis                                       | Effectiveness   | Homozygous F508del-mutation in the CFTR-gene                               | Compulsory test since 11/2015  |
| Maraviroc            | HIV                                                  | Effectiveness   | CCR5-tropic HI-viruses                                                     | Compulsory test since 09/2007  |
| Mercaptopurine       | Acute lymphatic leukaemia                            | Adverse effects | TMPT                                                                       | Recommended                    |
| Natalizumab          | Multiple sclerosis                                   | Adverse effects | Anti-JCV-antibody                                                          | Recommended test since 06/2011 |
| Necitumumab          | Non-small cell lung cancer                           | Effectiveness   | EGFR                                                                       | Compulsory test since 02/2016  |
| Nilotinib            | Chronic myelogenous leukaemia                        | Effectiveness   | Philadelphia-Chromosome                                                    | Compulsory test since 11/2007  |
| Olaparib             | Ovarian cancer                                       | Effectiveness   | BRCA                                                                       | Compulsory test since 12/2014  |
| Osimertinib          | Non-small cell lung cancer                           | Effectiveness   | EGFR                                                                       | Compulsory test since 02/2016  |
| Oxcarbazepine        | Epilepsy                                             | Adverse effects | HLA-B*1502-Allele                                                          | Recommended test since 07/2012 |
| Panitumumab          | Colorectal cancer                                    | Effectiveness   | Non-mutated (wild-type) RAS-gene                                           | Compulsory test since 12/2007  |
| Pertuzumab           | Breast cancer                                        | Effectiveness   | HER2-overexpression                                                        | Compulsory test since 03/2013  |
| Ponatinib            | Acute lymphatic leukaemia                            | Effectiveness   | Philadelphia-Chromosome                                                    | Compulsory test since 07/2013  |
| Tamoxifen            | Breast cancer                                        | Effectiveness   | Hormone receptor positive breast cancer cells                              | Recommended                    |
| Toremifen            | Breast cancer                                        | Effectiveness   | Hormone receptor positive breast cancer cells                              | Compulsory test since 02/1996  |
| Trametinib           | Melanoma                                             | Effectiveness   | BRAF V600-mutation                                                         | Compulsory test since 06/2014  |
| Trastuzumab          | Breast cancer und gastric cancer                     | Effectiveness   | HER2-overexpression, HER2, gene copy number                                | Compulsory test since 08/2000  |
| Trastuzumab emtansin | Breast cancer                                        | Effectiveness   | HER2-overexpression                                                        | Compulsory test since 11/2013  |
| Vandetanib           | Medullary carcinoma of the thyroid                   | Effectiveness   | RET-mutation                                                               | Recommended test since 02/2012 |
| Vemurafenib          | Melanoma                                             | Effectiveness   | BRAF-V600 mutation                                                         | Compulsory test since 02/2012  |
