# Supplementary material for: Cost-Effectiveness of Pharmacogenomic and Pharmacogenetic Test-Guided Personalized Therapies: A Systematic Review of the Approved Active Substances for Personalized Medicine in Germany
Source: PubMed Central journal article supplement — Adv Ther. 2016 Jul 12;33(9):1461–80. doi: 10.1007/s12325-016-0376-8 (PMC5020122; doi:10.1007/s12325-016-0376-8), 2016-07-12
Supplement: 12325_2016_376_MOESM2_ESM.pdf [file 12325_2016_376_MOESM2_ESM.pdf]

## Supplementary Material 2: Summary of the included publications

| Author (publication year)                                                     | Country/perspective                                                                  | Disease                                     | Treatment                                                        | Active ingredient       | Biomarker     | Treatment strategy                                                                                                                                                                                                                                                                                                                                                                                                                                                                                                                                                                                                                                                                            | Result/[price year]                                                                                                                                                                                                                                                                                                                                                                                                                                                             | Consideration of test costs/Sensitivity and specificity | Funding                                                                                                |
|-------------------------------------------------------------------------------|--------------------------------------------------------------------------------------|---------------------------------------------|------------------------------------------------------------------|-------------------------|---------------|-----------------------------------------------------------------------------------------------------------------------------------------------------------------------------------------------------------------------------------------------------------------------------------------------------------------------------------------------------------------------------------------------------------------------------------------------------------------------------------------------------------------------------------------------------------------------------------------------------------------------------------------------------------------------------------------------|---------------------------------------------------------------------------------------------------------------------------------------------------------------------------------------------------------------------------------------------------------------------------------------------------------------------------------------------------------------------------------------------------------------------------------------------------------------------------------|---------------------------------------------------------|--------------------------------------------------------------------------------------------------------|
| van den Akker-van Marle, M. E./ Gurwitz, D./ Detmar, S. B. et al. (2006) [32] | Four European member states (Germany, Ireland, Netherlands, UK)/societal perspective | Acute lymphoblastic leukaemia (ALL)         | n.s.                                                             | Mercaptopurine          | TPMT          | (a) TPMT-genotyping: dosing mercaptopurine according to TPMT activity (wildtype (normal), intermediate, or deficient)<br><br>(b) no TPMT-testing: standard doses                                                                                                                                                                                                                                                                                                                                                                                                                                                                                                                              | ICER (a) vs. (b): €4800 (\$5702) per LYG<br><br>[price year 2004]                                                                                                                                                                                                                                                                                                                                                                                                               | yes/yes                                                 | European Commissions: European Science and Technology Observatory network (ESTO)                       |
| Behl A. S./Goddard K. A. B./Flottesch T. J. et al. (2012) [33]                | USA/perspective n. s.                                                                | Metastatic colorectal cancer (mCRC)         | Second-line therapy (after failed chemotherapy)                  | Cetuximab vs. BSC       | KRAS + (BRAF) | (a) No KRAS-Testing and no anti-EGFR therapy (cetuximab): all patients receive BSC<br><br>(b) KRAS and BRAF-mutation screening: Patients without KRAS and BRAF mutation receive anti-EGFR therapy (cetuximab)<br><br>(c) KRAS mutation screening: Patients without KRAS mutation receive Cetuximab<br><br>(d) no KRAS testing: anti-EGFR therapy (Cetuximab)                                                                                                                                                                                                                                                                                                                                  | ICER (b) vs. (a): \$648,396 pro LYS<br><br>ICER (b) vs. (d): most cost effective strategy (significantly lower costs at marginally less benefit)<br><br>ICER (c) vs. (d): is dominated by (b) vs. (d)<br><br>[price year 2010]                                                                                                                                                                                                                                                  | yes/no                                                  | National Cancer Institute at the National Institutes of Health                                         |
| Blank, P. R./Schwenkglenks, M./Moch, H. et al. (2010) [34]                    | Switzerland/health care system                                                       | Breast cancer (early stage)                 | Second-line therapy (after adjuvant or neoadjuvant chemotherapy) | Trastuzumab             | HER2          | (a) IHC-/ FISH-Test: all patients: <b>reference strategy</b> (no Trastuzumab)<br><br>(b) IHC-test and subsequent FISH-test for IHC2+ patients: trastuzumab treatment for FISH+ or IHC3+ patients; standard therapy for all other patients<br><br>(c) FISH-Test: trastuzumab treatment for FISH+ patients; standard therapy for all other patients<br><br>(d) IHC-Test: trastuzumab treatment for IHC 2+ and IHC3+ patients; standard therapy for all other patients<br><br>(e) IHC-test and FISH-test (parallel): trastuzumab treatment for IHC2+ and IHC3+ and/or FISH+ patients; standard therapy for all other patients<br><br>(f) No IHC-test/FISH-Test: all patients receive trastuzumab | ICER (c) vs. (a): €12,245 (US\$15,676) per QALY<br><br>ICER (f) vs. (e): €13,456,577 (US\$17,226,646) per QALY<br><br>ICER (e) vs. (c): €400,154 (US\$512,263) per QALY<br><br>ICER (b) vs. (a): dominated (higher costs and less effective)<br><br>( e) vs. (f) is dominated by (c) vs. (f)<br><br>(d) is dominated by (c): less effective and more expensive<br><br>(b) is extendedly dominated by (c): less expensive but also less cost-effective<br><br>[price year n. s.] | yes/yes                                                 | ETH Zurich Foundation; Competence Center for Systems Physiology and Metabolic Diseases (CC-SPMD)       |
| Blank, P. R./Moch, H./ Szucs, T. D. et al. (2011) [35]                        | Switzerland/health system                                                            | Metastatic colorectal cancer (mCRC)         | Second-line therapy (after failed chemotherapy)                  | Cetuximab + BSC vs. BSC | KRAS + (BRAF) | (a) no KRAS-Test and no treatment with cetuximab: all patients receive BSC<br><br>(b) KRAS Test and a subsequent BRAF Test: KRAS and BRAF wild-type tumour patients receive cetuximab + BSC; patients with a mutation of KRAS and/or BRAF gene receive BSC<br><br>(c) KRAS Test: KRAS wild-type tumour patients receive cetuximab + BSC; patients with a mutation of KRAS gene receive BSC<br><br>(d) No KRAS-Test: all patients receive cetuximab + BSC                                                                                                                                                                                                                                      | ICER (b) vs. (a): €62,653 (US\$83,279) pro QALY<br><br>ICER (c) vs. (b): €313,537 (US\$416,755) pro QALY<br><br>ICER (d) vs. (c): €314,588 (US\$418,152) pro QALY<br><br>[price year n. s.]                                                                                                                                                                                                                                                                                     | yes/yes                                                 | ETH Zurich Foundation; Competence Center for Systems Physiology and Metabolic Diseases (CC-SPMD)       |
| Carlson, J. J./Garrison, L. P./Ramsey, S. D. et al. (2009) [36]               | USA/societal perspective                                                             | Advanced non-small cell lung cancer (NSCLC) | Second-line therapy (after failed chemotherapy)                  | Erlotinib vs. docetaxel | EGFR          | (a) EGFR protein expression test: high protein expression (positive) = erlotinib until progression; low protein expression (negative)= docetaxel until progression (IHC)<br><br>(b) EGFR gene copy test: high gene copy number (positive) = erlotinib until progression; low gene copy number (negative)= docetaxel until progression (GC)<br><br>(c) no EGFR-Test: erlotinib until progression                                                                                                                                                                                                                                                                                               | ICER (b) vs. (c): US\$162,018 per QALY<br><br>ICER (a) vs. (c): US\$179,612 per QALY<br><br>ICER (b) vs. (a): dominant (ICER of (b) vs. (c) is better than ICER of (a) vs. (c))<br><br>[price year 2006]                                                                                                                                                                                                                                                                        | yes/no                                                  | The author was supported in part by a pre-doctoral Fellowship in Health outcomes from PhRMA Foundation |

|                                                               |                                             |                                     |                    |                                             |            |                                                                                                                                                                                                                                                                                                                                                                                                                                                                                                                                                                                                                                                                                                                                                                                                                                                                                                                                                                          |                                                                                                                                                                                                                                                                                                                                                                                                                   |         |                                                                                              |
|---------------------------------------------------------------|---------------------------------------------|-------------------------------------|--------------------|---------------------------------------------|------------|--------------------------------------------------------------------------------------------------------------------------------------------------------------------------------------------------------------------------------------------------------------------------------------------------------------------------------------------------------------------------------------------------------------------------------------------------------------------------------------------------------------------------------------------------------------------------------------------------------------------------------------------------------------------------------------------------------------------------------------------------------------------------------------------------------------------------------------------------------------------------------------------------------------------------------------------------------------------------|-------------------------------------------------------------------------------------------------------------------------------------------------------------------------------------------------------------------------------------------------------------------------------------------------------------------------------------------------------------------------------------------------------------------|---------|----------------------------------------------------------------------------------------------|
| Dong, D./Sung, C./Finkelstein, E. A. (2012) [37]              | Asia/perspective n. s.                      | Epilepsy                            | First-line therapy | Carbamazepine (CBZ) vs. valproate (VPA)     | HLA-B*1502 | (a) no HLA-B*1502-Test: all patients receive CBZ/phenytoin (PHT)<br>(b) HLA-B*1502-Test: negative test result = patients receive CBZ/PHT; positive test result = patients receive VPA<br>(c) no HLA-B*1502-testing: all patients receive VPA                                                                                                                                                                                                                                                                                                                                                                                                                                                                                                                                                                                                                                                                                                                             | ICER (b) vs. (a): US\$29,750 per QALY<br>ICER (c) vs. (b): is dominated (higher costs and same efficacy)<br>ICER (b) vs. (a) for 3 major ethnical populations in Singapore:<br>Singapore Chinese: US\$37,030 pro QALY<br>Singapore Malays: US\$7930 pro QALY<br>Singapore Indians: US\$136,630 pro QALY<br>[price year 2010]                                                                                      | yes/yes | Duke-NUS Graduate Medical School                                                             |
| Donnan, J. R./Ungar, W. J./Mathews, M. et al. (2011) [38]     | Canada/health care system                   | Acute lymphoblastic leukaemia (ALL) | n.s.               | Mercaptopurine                              | TPMT       | (a) genotypic TPMT-test: dosing mercaptopurine accordingly TPMT activity; TPMT deficiency: dose reducing; no TPMT deficiency: weight-based dosing<br>(b) enzymatic-TPMT-test: dosing mercaptopurine accordingly TPMT activity- TPMT deficiency: dose reducing; no TPMT deficiency: weight-based dosing<br>(c) no testing: weight-based dosing mercaptopurine (standard of care)                                                                                                                                                                                                                                                                                                                                                                                                                                                                                                                                                                                          | (a) total expected costs per patient CAD-\$1090 (US\$883), expected survival 2.9997 months<br>(b) total expected costs per patient CAD-\$1020 (US\$826), expected survival 2.9997 months<br>(c) total expected costs per patient CAD-\$654 (US\$530), expected survival 2.9997 months<br>[price year 2008]                                                                                                        | yes/yes | Atlantic Canada Opportunities Agency, the provincial government of Newfoundland and Labrador |
| Dubinsky, M. C./Reyes, E./Ofman, J. et al. (2005) [39]        | Country n. s./Third-party payer perspective | Inflammatory bowel disease (IBD)    | First-line therapy | Azathioprine (AZA)                          | TPMT       | (a) Community care: therapy started on lowest AZA dose threshold of 50 mg; AZA dose could increase to 100 mg AZA, if a patient did not respond clinically at 3 months; After 6 months, patients responding to the 100 mg dose AZA continued current treatment.<br>(b) TPMT screening: AZA dose according to TPMT-genotype: initial doses by TPMT wild-type (normal) = 100 mg AZA; TPMT intermediate = 50 mg AZA; TPMT deficient = no AZA (patients receive MTX (25 mg)<br>(c) TPMT screening and metabolite monitoring: similar to TPMT screening; initial dosing depends on patients' TPMT genotype: initial dosing by TPMT wild-type (normal) = 100 mg AZA; TPMT intermediate = 50 mg AZA; TPMT deficient = no AZA (patients receive MTX therapy (25 mg); After 4 weeks AZA dose could be adjusted according to patients' metabolite level<br>(d) Metabolite monitoring: Initial dose at 50 mg AZA; AZA dose could be adjusted according to patients' metabolite level | (a) is dominated by (b), (c) and (d): higher costs and longer time to reach sustained response<br>(c) vs. (b): higher costs (US\$5877 vs. US\$3681) and faster time to reach sustained response (19.10 vs. 18.96 weeks) (no ICER is reported)<br>(d) vs. (c): higher costs (US\$6441 vs. US\$5877) and faster time to reach sustained response (18.66 vs. 18.96 weeks) (no ICER is reported)<br>[price year 2004] | yes/no  | n. s.                                                                                        |
| Elkin, E. B./Weinstein, M. C./Winer, E. P. et al. (2004) [40] | USA/societal perspective                    | Metastatic breast cancer            | First-line therapy | Trastuzumab + chemotherapy vs. chemotherapy | HER2       | (a) no IHC-/FISH-Test: chemotherapy alone<br>(b) IHC-Test: trastuzumab and chemotherapy for IHC +3 patients; for all others chemotherapy alone<br>(c) IHC-Test and confirmatory FISH-test for patients with +2 and +3: trastuzumab + chemotherapy for FISH+ patients; for all others chemotherapy alone<br>(d) IHC-Test and confirmatory FISH-Test for patients with IHC +2; trastuzumab + chemotherapy for FISH+ or IHC +3 patients; for all others chemotherapy alone<br>(e) IHC: trastuzumab + chemotherapy for IHC +2 and +3 patients; for all others chemotherapy alone<br>(f) FISH-Test: trastuzumab + chemotherapy for FISH+ patients; for all others chemotherapy alone<br>(g) no IHC-/ FISH-Test: trastuzumab + chemotherapy for all                                                                                                                                                                                                                            | ICER (b) vs. (c): less effective (ruled out by extended dominance)<br>ICER (d) vs. (c): dominated (more costly + equally effective)<br>ICER (g) vs. (f): dominated (higher costs + same effectiveness)<br>ICER (e) vs. (g): dominated (less effective + more expensive)<br>ICER (c) vs. (a): US\$125,100 pro QALY<br>ICER (f) vs. (c): US\$145,400 pro QALY<br>[price year 2002]                                  | yes/yes | National Library of Medicine Research Training Program in Medical Informatics                |

|                                                               |                             |                                               |                               |                                                                                                                                                                                                                        |               |                                                                                                                                                                                                                                                                                                                                                                                                                                                                                                                                                                                                                                                                                                                                                                                                                                                                                                                                                                                                                                                                                                                                                                                                                                                                                  |                                                                                                                                                                                                                                                                                                                                                                                                                                                                                                                                         |         |                                                             |
|---------------------------------------------------------------|-----------------------------|-----------------------------------------------|-------------------------------|------------------------------------------------------------------------------------------------------------------------------------------------------------------------------------------------------------------------|---------------|----------------------------------------------------------------------------------------------------------------------------------------------------------------------------------------------------------------------------------------------------------------------------------------------------------------------------------------------------------------------------------------------------------------------------------------------------------------------------------------------------------------------------------------------------------------------------------------------------------------------------------------------------------------------------------------------------------------------------------------------------------------------------------------------------------------------------------------------------------------------------------------------------------------------------------------------------------------------------------------------------------------------------------------------------------------------------------------------------------------------------------------------------------------------------------------------------------------------------------------------------------------------------------|-----------------------------------------------------------------------------------------------------------------------------------------------------------------------------------------------------------------------------------------------------------------------------------------------------------------------------------------------------------------------------------------------------------------------------------------------------------------------------------------------------------------------------------------|---------|-------------------------------------------------------------|
| Hagaman, J. T./Kinder, B. W./Eckman, M. H. (2010) [22]        | USA/perspective n. s.       | Idiopathic pulmonary fibrosis (IPF)           | n.s.                          | Azathioprine (AZA) in combination with N-acetylcysteine and steroids vs. conservative therapy (no AZA)                                                                                                                 | TPMT          | (a) TPMT-Test: Dosage of AZA according TPMT-activity: normal TPMT activity: standard doses; TPMT intermediate (reduced TPMT activity): reduced doses; TPMT deficient (absent TPMT-activity): conservative therapy without AZA<br><br>(b) no TPMT-Test: AZA<br><br>(c) conservative therapy                                                                                                                                                                                                                                                                                                                                                                                                                                                                                                                                                                                                                                                                                                                                                                                                                                                                                                                                                                                       | ICER (a) vs. (c): US\$49,156 per QALY<br><br>ICER (a) vs. (b): US\$29,663 per QALY<br><br>[price year 2007]                                                                                                                                                                                                                                                                                                                                                                                                                             | yes/no  | n. s.                                                       |
| Hall, P. S./McCabe, C./Stein, R. C. et al. (2012) [41]        | UK/NHS                      | Early-stage lymph node-positive breast cancer | First-line therapy            | Tamoxifen + chemotherapy vs. tamoxifen                                                                                                                                                                                 | HOXB13-IL17BR | (a) Test of recurrence (Oncotype DX): low recurrence score (RS ≤ 18): no chemotherapy, only tamoxifen; high recurrence score (RS > 18): chemotherapy + tamoxifen<br><br>(b) standard of care: chemotherapy + tamoxifen                                                                                                                                                                                                                                                                                                                                                                                                                                                                                                                                                                                                                                                                                                                                                                                                                                                                                                                                                                                                                                                           | ICER (a) vs. (b): £5529 (US\$8852)** per QALY (starting age of the patient cohort was 60 years)<br><br>[price year 2011]                                                                                                                                                                                                                                                                                                                                                                                                                | yes/no  | No external funding                                         |
| Hughes, D. A./Vilar, F. J./Ward, C. C. et al. (2004) [42]     | UK/NHS                      | HIV/AIDS                                      | First-line therapy            | Abacavir-containing combination therapy vs. alternative highly active antiretroviral therapy (HAART) without abacavir                                                                                                  | HLA-B*5701    | (a) HLA-B*5701-Test: negative test result = Abacavir-containing regimens (by a HSR: further treatment with alternative HAART); positive test result = alternative HAART<br><br>(b) no HLA-B*5701-Test: Abacavir-containing regimens (by a HSR: further treatment with alternative HAART)                                                                                                                                                                                                                                                                                                                                                                                                                                                                                                                                                                                                                                                                                                                                                                                                                                                                                                                                                                                         | (a) vs. (b): ranged from dominant strategy (less expensive + more effective) up to €22,811 (US\$26,714) per avoid HSR (population of 1000 patients) (depending on the costs of respective alternative HAART: low cost = ICER dominant; high cost = ICER up to €22,811 (US\$26,714) per avoid HSR)<br><br>[price year 2002]                                                                                                                                                                                                              | yes/yes | n. s.                                                       |
| Kapoor, R./Martinez-Vega, R./Dong, D. et al. (2015) [43]      | Singapore/healthcare system | HIV infection (early and late stage)          | First-line therapy            | First-line ABC-based ART substituted with tenofovir-based ART as second-line in the event of side effects<br><br>vs.<br><br>first-line tenofovir-based ART substituted with ABC-based ART in the event of side effects | HLA-B*5701    | <b>Tenofovir and abacavir can be prescribed as first-line treatment</b><br><u>Early Stage</u><br>(a) No HLA-B*5701-testing: ABC as first line (Chinese (a1); Malays (a2); Indians (a3))<br>(b) HLA-B*5701: ABC as first-line Chinese (b1); Malays (b2); Indians (b3)<br>(c) HLA-B*5701-testing before ABC: Tenofovir as first line Chinese (c1); Malays (c2); Indians (c3)<br>(d) No HLA-B*5701 done before ABC: Tenofovir as first-line [Chinese (d1); Malays (d2); Indians (d3)]<br><br><u>Late stage:</u><br>(e) No HLA-B*5701-testing: ABC as first line Chinese (e1); Malays (e2); Indians (e3)<br>(f) HLA-B*5701: ABC as first-line Chinese (f1); Malays (f2); Indians (f3)<br>(g) HLA-B*5701-testing before ABC: tenofovir as first line Chinese (g1); Malays (g2); Indians (g3)<br>(h) No HLA-B*5701 done before ABC: tenofovir as first-line Chinese (h1); Malays (h2); Indians (h3)<br><br><b>Patients who are contraindicated to tenofovir</b><br><u>Early stage</u><br>(i) No genetic testing Chinese (i1); Malays (i2); Indians (i3)<br>(j) HLA-B*5701-testing Chinese (j1); Malays (j2); Indians (j3)<br><br><u>Late stage</u><br>(k) No genetic testing Chinese (k1); Malays (k2); Indians (k3)<br>(l) HLA-B*5701-testing Chinese (l1); Malays (l2); Indians (l3) | ICER (b1) vs. (a1): US\$415,845/QALY<br><br>ICER (b2) vs. (a2): US\$318,029/QALY<br><br>ICER (b3) vs. (a3): US\$208,231/QALY<br><br>ICER (f1) vs. (e1): US\$926,938/QALY<br><br>ICER (f2) vs. (e2): US\$624,297/QALY<br><br>ICER (f3) vs. (e3): US\$284,598/QALY<br><br>ICER (j1) vs. (i1): US\$252,350/QALY<br><br>ICER (j2) vs. (i2): US\$154,490/QALY<br><br>ICER (j3) vs. (i3): US\$44,649/QALY<br><br>ICER (l1) vs. (k1): US\$757,270/QALY<br><br>ICER (l2) vs. (k2): US\$454,223/QALY<br><br>ICER (l3) vs. (k3): US\$114,068/QALY | yes/yes | n. s.                                                       |
| Kauf, T. L./Farkouh, R. A./Earnshaw, S. R. et al. (2010) [44] | USA/healthcare system       | HIV/AIDS                                      | First-line therapy            | Abacavir and lamivudine + efavirenz (fixed dosed regimen) vs. alternative high active antiretroviral therapy (HAART) with tenofovir+emtricitabine+efavirenz (fixed dosed)                                              | HLA-B*5701    | (a) HLA-B*5701-Test: negative test result = abacavir-containing regimens (by a HSR: further treatment with alternative HAART); positive test result = alternative HAART<br><br>(b) no HLA-B*5701-Test: abacavir-containing regimens (by a HSR: further treatment with alternative HAART)                                                                                                                                                                                                                                                                                                                                                                                                                                                                                                                                                                                                                                                                                                                                                                                                                                                                                                                                                                                         | (a) vs. (b): US\$328 per avoid HSR<br><br>[price year 2007]                                                                                                                                                                                                                                                                                                                                                                                                                                                                             | yes/yes | GlaxoSmithKline, Inc. (Research Triangle Park, NC, USA)     |
| de Lima Lopes, G./Segel, J. E./Tan, D. S. et al. (2012) [45]  | Asia/perspective n. s.      | Non-small cell lung cancer (NSCLC)            | First- or second-line therapy | Gefitinib vs. chemotherapy                                                                                                                                                                                             | EGFR          | (a) no EGFR-testing: chemotherapy as first-line therapy, subsequent treatment with gefitinib as second-line treatment (standard therapy)<br><br>(b) EGFR-testing: patients with activating EGFR-mutation receive gefitinib as first-line therapy and chemotherapy as second-line therapy; patients without mutation receive chemotherapy as first-line therapy and BSC as second-line therapy                                                                                                                                                                                                                                                                                                                                                                                                                                                                                                                                                                                                                                                                                                                                                                                                                                                                                    | ICER (b) vs. (a): dominant (less expensive and more effective)<br><br>[price year 2010]                                                                                                                                                                                                                                                                                                                                                                                                                                                 | yes/no  | AstraZeneca (Singapore) Pte Ltd (biopharmaceutical company) |

|                                                                                |                                                                                    |                                                                                    |                     |                                        |               |                                                                                                                                                                                                                                                                                                                                                                                                                                                                                                                                                                                                                                                                                                                                                                                                  |                                                                                                                                                                                                                                                                                                                            |         |                                                                                                                                                                                |
|--------------------------------------------------------------------------------|------------------------------------------------------------------------------------|------------------------------------------------------------------------------------|---------------------|----------------------------------------|---------------|--------------------------------------------------------------------------------------------------------------------------------------------------------------------------------------------------------------------------------------------------------------------------------------------------------------------------------------------------------------------------------------------------------------------------------------------------------------------------------------------------------------------------------------------------------------------------------------------------------------------------------------------------------------------------------------------------------------------------------------------------------------------------------------------------|----------------------------------------------------------------------------------------------------------------------------------------------------------------------------------------------------------------------------------------------------------------------------------------------------------------------------|---------|--------------------------------------------------------------------------------------------------------------------------------------------------------------------------------|
| Lyman, G. H./Cosler, L. E./Kuderer, N. M. et al. (2007) [46]                   | USA/societal perspective                                                           | Early-stage breast cancer                                                          | First-line therapy  | Tamoxifen + chemotherapy vs. tamoxifen | HOXB13-IL17BR | (a) 21-gene RT-PCR assay: low risk patients (recurrence score <18): tamoxifen alone; intermediate (recurrence score 18-30) and high-risk patients (recurrence score ≥ 31) receive chemotherapy and tamoxifen.<br><br>(b) no test: chemotherapy + tamoxifen<br><br>(c) no test: tamoxifen                                                                                                                                                                                                                                                                                                                                                                                                                                                                                                         | ICER (a) vs. (c): US\$1944 per LYS<br><br>ICER (a) vs. (b): US\$3385 per LYS<br><br>[price year n.s.]                                                                                                                                                                                                                      | yes/no  | Genomic Health; Amgen                                                                                                                                                          |
| Marra, C. A./Esdaile, J. M./Anis, A. H. (2002) [47]                            | Canada/payer perspective                                                           | Rheumatological conditions (rheumatoid arthritis and systemic lupus erythematosus) | n.s.                | Azathioprine (AZA)                     | TPMT          | (a) genotype TPMT-Test: AZA dosing according to genotype/TPMT-activity = TPMT homozygous wild type (normal TPMT-activity): target dose of 2.0-2.5 mg/kg/day; TPMT heterozygous (reduced TPMT-activity): target dose 1.0 mg/kg/day; TPMT homozygous mutant (deficient of TPMT-activity): target dose 0.25 mg/kg/day<br><br>(b) no TPMT-Test: normal dosing                                                                                                                                                                                                                                                                                                                                                                                                                                        | (a) dominates (b) (more effective and less costly)<br><br>[price year 1999]                                                                                                                                                                                                                                                | yes/yes | Canadian Arthritis Network (a Canadian Network of Centres of Excellence)                                                                                                       |
| Nieves Calatrava, D./De la Calle-Martin, O./Iribarren-Loyarte, J.(2009) [48]   | Spain/National Health System                                                       | HIV infection                                                                      | First-line Therapy  | Abacavir (ABC)                         | HLA-B*5701    | (a)HLA-B*5701-Test: positive test result: patients receive a HAART regimen without ABC; patients with a negative test result receive a HAART regimen with ABC<br><br>(b) No HLA-B*5701-Test: all patients receive ABC                                                                                                                                                                                                                                                                                                                                                                                                                                                                                                                                                                            | Incremental cost: (a) vs. (b) €630.16 (US\$807) per HSR avoid<br><br>[price year 2008]                                                                                                                                                                                                                                     | yes/yes | GlaxoSmithKline                                                                                                                                                                |
| Oh, K.-T./Anis, A. H./ Bae, S.-C. (2004) [49]                                  | Korea/societal perspective                                                         | Rheumatoid arthritis and systemic lupus erythematosus                              | Second-line therapy | Azathioprine (AZA)                     | TPMT          | (a) genotypic TPMT-Test: AZA dosing according to genotype/TPMT-activity:<br>• TPMT wild type (high activity): Initial dosage 1 mg/kg, dose increment began at 4 weeks; further increment: 0.5 mg/kg steps at 4-week-intervals (target daily dose: 2.5 mg/kg);<br>• TPMT intermediary/heterozygous mutant type(reduced activity): Initial dosage: 0.5 mg/kg, dose increment began at 4 weeks, further increment: 0.5 mg/kg steps at 4-week-intervals (target daily dose: 1 mg/kg);<br>• TPMT deficient/ homozygous mutant type (low or no activity): Initial dosage: 0.25 mg/kg, no increment.<br><br>(b)no TPMT-Test: conventional weight-based dosing of AZA started at 1 mg/kg daily, dose increase began at 8 weeks in 0.5 mg/kg steps (4-week intervals) up to the target dose of 2.5 mg/kg. | (a) vs. (b): dominant (less costly + more effective)<br><br>[price year 2002]                                                                                                                                                                                                                                              | yes/yes | Korea Health 21 R&D project - Ministry of Health and Welfare (Republic of Korea)                                                                                               |
| Plumpton, C./Yip, V./Marson, A. et al.(2015) [50]                              | UK/National Health Service (NHS)                                                   | Epilepsy                                                                           | First-line therapy  | Carbamazepine (CBZ)                    | HLA-A*31:01   | (a) No HLA-A*31:01-testing: all patients receive CBZ<br><br>(b) HLA-A*31:01-Testing: positive test result: patients receive CBZ; negative test result: patients receive lamotrigine                                                                                                                                                                                                                                                                                                                                                                                                                                                                                                                                                                                                              | ICER (b) vs. (a) per LYG: dominated<br>ICER (b) vs. (a) per seizure-free year: dominated<br><br>ICER (b) vs. (a) per cutaneous ADR avoid: £37,314 (US\$53,674)<br><br>ICER (b) vs. (a) per QALY gained: £12,808 (US\$18,424)<br><br>[price year 2010-2011***]                                                              | yes/no  | NIHR Cochrane Programme Grant Scheme 10/4001/18: Clinical and cost effectiveness of interventions for epilepsy in the NHS; and the NIHR Invention for Innovation (i4i) scheme: |
| Priest, V. L./Begg, E. J./Gardiner, S. J, et al. (2006) [51]                   | New Zealand/payer's perspective (the New Zealand government and patients with IBD) | Inflammatory bowel disease (IBD)                                                   | First-line therapy  | Azathioprine (AZA)                     | TPMT          | (a) no TPMT-Test: standard dosage AZA<br><br>(b) genotypic-TPMT-Test: dosage of AZA according to TPMT-activity<br><br>(c) phenotypic-TPMT-Test: dosage of AZA according to TPMT-activity                                                                                                                                                                                                                                                                                                                                                                                                                                                                                                                                                                                                         | (a) is dominated by (b) and (c)<br><br>(c) vs. (b): dominant (less costly and more effective)<br><br>[price year 2004]                                                                                                                                                                                                     | yes/yes | No external funding                                                                                                                                                            |
| RattanaViopapong, W./Koo Pitakajorn, N./Mahasirimongkol, S. et al. (2013) [52] | Thailand/societal perspective                                                      | Epilepsy and neuropathic pain                                                      | First-line therapy  | Carbamazepine (CBZ)                    | HLA-B*15:02   | (a) No HLA-B*15:02-Screening: Patients receive CBZ<br><br>(b) HLA-B*15:02-Screening for all patients: patients with a positive test result receive the alternative drugs; negative tested patients receive CBZ<br><br>(c) No HLA-B*15:02-Screening: all patients receive an alternative drug treatment                                                                                                                                                                                                                                                                                                                                                                                                                                                                                           | <u>Epilepsy:</u><br>ICER (b) vs. (a): 220,000 THB (US\$7066) per QALY<br>ICER (c) vs. (a): 32,522,000 THB (US\$1,035,073) per QALY<br><br><u>neuropathic pain</u><br>ICER (b) vs. (a): 130,000 THB (US\$4137) per QALY gained<br>ICER (c) vs. (b): 35,877,000 THB (US\$1,141,852) per QALY gained<br><br>[price year 2011] | yes/yes | n. s.                                                                                                                                                                          |

|                                                                  |                                               |                                              |                                                       |                                                                                                                                                                                                                               |            |                                                                                                                                                                                                                                                                                                                                                                                                                                                                                                                                                                                                                                           |                                                                                                                                                                                                                                                                                                                                                   |         |                                                                                                                                       |
|------------------------------------------------------------------|-----------------------------------------------|----------------------------------------------|-------------------------------------------------------|-------------------------------------------------------------------------------------------------------------------------------------------------------------------------------------------------------------------------------|------------|-------------------------------------------------------------------------------------------------------------------------------------------------------------------------------------------------------------------------------------------------------------------------------------------------------------------------------------------------------------------------------------------------------------------------------------------------------------------------------------------------------------------------------------------------------------------------------------------------------------------------------------------|---------------------------------------------------------------------------------------------------------------------------------------------------------------------------------------------------------------------------------------------------------------------------------------------------------------------------------------------------|---------|---------------------------------------------------------------------------------------------------------------------------------------|
| Schackman, B. R./Scott, C. A./Walensky, R. P. et al. (2008) [53] | USA/perspective n. s.                         | HIV/AIDS                                     | First-line therapy                                    | Abacavir-based treatment vs. tenofovir-based treatment                                                                                                                                                                        | HLA-B*5701 | (a) HLA-B*5701-testing: negative test result: abacavir-based treatment (abacavir + lamivudine + efavirenz); positive test result: tenofovir-based treatment<br><br>(b) No HLA-B*5701-testing: abacavir-based therapy (abacavir + lamivudine + efavirenz); occurrence of HSR: further treatment with tenofovir-based treatment<br><br>(c) No HLA-B*5701-testing: tenofovir-based therapy (tenofovir + emtricitabine + efavirenz); occurrence of nephrotoxicity: substituting abacavir and lamivudine                                                                                                                                       | ICER (a) vs. (b): US\$36,700 pro QALY<br><br>ICER (c) vs. (b): is dominated (higher costs + less effective)<br><br>[price year 2006]                                                                                                                                                                                                              | yes/no  | National Institute of Allergy and Infectious Diseases; National Institute on Drug Abuse                                               |
| Shiroiwa, T./Motoo, Y./Tsutani, K. (2010) [54]                   | Japan/health care payer                       | Metastatic colorectal cancer (mCRC)          | First-line therapy                                    | Cetuximab vs. BSC                                                                                                                                                                                                             | KRAS       | (a) KRAS testing: patients with KRAS wild-type receive cetuximab; patients with KRAS-mutation receive BSC<br><br>(b) no KRAS-testing - all patients receive cetuximab<br><br>(c) no KRAS-testing - all patients receive BSC                                                                                                                                                                                                                                                                                                                                                                                                               | ICER (b) vs. (c): US\$160,000 pro LYG; US\$230,000 pro QALY<br><br>ICER (a) vs. (c): US\$120,000 pro LYG; US\$180,000 pro QALY<br><br>ICER (a) vs. (b): dominant (lower cost with the same or better outcome)<br><br>[price year 2010]                                                                                                            | yes/no  | Roche Diagnostics KK                                                                                                                  |
| Thompson, A./Newman W.G./Elliott, R. A. et al. (2014) [12]       | UK/health service perspective                 | Autoimmune diseases                          | n.s.                                                  | Azathioprine (AZA)                                                                                                                                                                                                            | TPMT       | (a) No TPMT- genotyping (current practice):<br>• TPMT-wild type (normal activity): starting dose: 0.86 +/- 0.53 mg AZA; Maintenance dose at 4 months: 1.74 +/- 0.50 mg AZA;<br>• TPMT-heterozygous (low activity): starting dose: 0.93 +/- 0.64 mg AZA; Maintenance dose at 4 months: 1.62 +/- 0.56 mg AZA<br><br>(b) TPMT genotyping:<br>• TPMT-wild type (normal activity): starting dose: 0.92 +/- 0.60 mg/kg/d AZA; Maintenance dose at 4 months: 1.62 +/- 0.55 mg/kg/d AZA<br>• TPMT-heterozygous (low activity): starting dose: 0.61 +/- 0.33 mg/kg/d AZA; Maintenance dose at 4 months: 1.80 +/- 0.89 mg/kg/d AZA                  | Incremental costs (adjusted) for TPMT-genotyping: (b) vs. (a): £421.06 (US\$625)<br><br>Incremental QALY for TPMT-genotyping: (b) vs. (a): -0.008<br><br>Incremental net benefit (b) vs. (a): £256.89 (\$381)<br><br>[price year 2009-2010***]                                                                                                    | yes/no  | TARGET-Study: The Department of Health UK; A.J. Thompson: NIHR School for Primary Research; Prof. Payne-Research Councils UK (partly) |
| Vijayaraghavan, A./Efrusy, M. B./Göke, B. et al. (2012) [55]     | USA and Germany/health care payer perspective | Advanced metastatic colorectal cancer (mCRC) | Second-line therapy (after failed prior chemotherapy) | Cetuximab<br>panitumumab<br>Combination therapy (US: cetuximab+irinotecan; Germany: cetuximab+FOLFIRI)<br>Combination therapy (US: cetuximab+irinotecan; Germany: cetuximab+FOLFIRI) vs. irinotecan (US) or FOLFIRI (Germany) | KRAS       | (a) no KRAS-testing: panitumumab<br><br>(b) KRAS-testing: panitumumab<br><br>(c) no KRAS-testing: cetuximab<br><br>(d) KRAS-testing: cetuximab<br><br>(e) no KRAS-testing: combination therapy: USA: cetuximab + irinotecan, Germany: cetuximab + FOLFIRI<br><br>(f) KRAS-testing: combination therapy: USA: cetuximab + irinotecan, Germany: cetuximab + FOLFIRI; (Assumption: patients with KRAS mutation will not receive chemotherapy)<br><br>(g) KRAS-testing: combination therapy: USA: cetuximab + irinotecan, Germany: cetuximab + FOLFIRI; patients with KRAS mutation (wild type) receive irinotecan (US) and FOLFIRI (Germany) | ICER (b) vs. (a): dominant (lower costs + same effectiveness)<br><br>ICER (d) vs. (c): dominant (lower costs + same effectiveness)<br><br>(f) vs. (e): less expensive + less effective = no ICER stated<br><br>(g) vs. (e): lower costs + same effectiveness, no ICER stated<br><br>ICER (g) vs. (f): US\$35,539 pro LYS<br><br>[price year 2009] | yes/yes | Roche Molecular Systems, Inc., United States (Roche)                                                                                  |
| Winter, J./Walker, A./Shapiro, D. et al. (2004) [56]             | UK/perspective n. s.                          | Inflammatory bowel disease (IBD)             | Second-line therapy                                   | Azathioprine (AZA) vs. alternative treatment                                                                                                                                                                                  | TPMT       | (a) TPMT-Test: AZA dosing according to genotype/TPMT-activity: homozygote does not receive AZA, heterozygotes receive a reduced dose AZA<br><br>(b) no TPMT-Test: all patients receive AZA                                                                                                                                                                                                                                                                                                                                                                                                                                                | (a) vs. (b): £487 (US\$776) per LYS (for a 30 year old patient) or £951 (US\$1515) per LYS (for a 60 year old patient)<br><br>[price year n. s.]                                                                                                                                                                                                  | yes/yes | n. s.                                                                                                                                 |

Abbreviations: ICER: incremental cost-effectiveness ratio; LYS: life-year saved; LYG: life-year gained; QALY: quality adjusted life years; n.s.: not stated; HSR: hypersensitivity reaction; ADR: adverse drug reaction; THB: Thai Baht; CAD: Canadian Dollars

\*As price year, the second year prior to the publication year, was assumed.

\*\* Not calculated by the authors

\*\*\* An average exchange rate of these two price years was calculated.
